# Supplementary material for: Inhibition of Recruitment and Activation of Neutrophils by Pyridazinone-Scaffold-Based Compounds
Source: Int J Mol Sci. 2022 Jun 29;23(13):7226. doi: 10.3390/ijms23137226 (PMC9266889; doi:10.3390/ijms23137226)
Supplement: Supplementary file 1 [file ijms-23-07226-s001.zip]

Archive with 6 entries (6 files):
- Figure S1.tif
- Figure S2.tif
- Figure S3.tif
- Figure S4.tif
- Figure S5.tif
- Template-IJMS Supp Info_R1.pdf
